# Supplementary material for: Social-Ecological Correlates of Regular Leisure-Time Physical Activity Practice among Adults
Source: PubMed Central journal article supplement (PMC7277494; doi:10.3390/ijerph17103619), 2020-05-21
Supplement: ijerph-17-03619-s001.pdf [file ijerph-17-03619-s001.pdf]

## Supplementary Material

**Table SM1** – Sample data VIGITEL 2006-2016

| Year         | TELEPHONES (n) |                   |                | INTERVIEWS (n) |                |                |
|--------------|----------------|-------------------|----------------|----------------|----------------|----------------|
|              | Replica        | Randomly Selected | Elegible       | Total          | Men            | Women          |
| 2006         | 536            | 107,200           | 76,330         | 54,369         | 21,294         | 33,075         |
| 2007         | 693            | 138,600           | 75,876         | 54,251         | 21,547         | 32,704         |
| 2008         | 530            | 106,000           | 72,834         | 54,353         | 21,345         | 32,918         |
| 2009         | 591            | 118,200           | 71,081         | 54,367         | 21,347         | 33,020         |
| 2010         | 633            | 126,600           | 71,082         | 54,339         | 20,764         | 33,575         |
| 2011         | 576            | 111,200           | 80,470         | 54,144         | 20,641         | 31,503         |
| 2012         | 577            | 115,418           | 70,045         | 45,488         | 17,389         | 28,059         |
| 2013         | 563            | 112,600           | 74,005         | 52,929         | 20,272         | 32,653         |
| 2014         | 506            | 101,200           | 62,786         | 40,853         | 15,521         | 25,332         |
| 2015         | 580            | 116,000           | 76,703         | 54,174         | 20,368         | 32,653         |
| 2016         | 636            | 127,200           | 77,671         | 53,210         | 20,258         | 32,952         |
| <b>TOTAL</b> | <b>6.421</b>   | <b>1,280,218</b>  | <b>808,883</b> | <b>572,477</b> | <b>220,746</b> | <b>348,444</b> |

**Source:** VIGITEL 2006-2016 (IBGE – [www.ibge.com.br](http://www.ibge.com.br))

**Table SM2 – Data extracted, unit of measure and Source**

| INFORMAÇÃO                                        | Unit               | Source   |
|---------------------------------------------------|--------------------|----------|
| Precipitação                                      | mm                 | INMET    |
| Insolação                                         | Horas              | INMET    |
| Temperatura mínima                                | Graus Celsius      | INMET    |
| Temperatura máxima                                | Graus Celsius      | INMET    |
| Umidade relativa                                  | %                  | INMET    |
| Umidade mínima                                    | %                  | INMET    |
| Umidade mínima                                    | %                  | INMET    |
| Frota de veículos                                 | n                  | DENATRAN |
| Frota de automóveis                               | n                  | DENATRAN |
| Frota de ônibus                                   | n                  | DENATRAN |
| Nº de empresas de esporte e lazer                 | n                  | IBGE/CCE |
| Idade                                             | years              | VIGITEL  |
| Sexo                                              | m/f                | VIGITEL  |
| Marital status                                    | s/m/d/w/na***      | VIGITEL  |
| Uso de tabaco                                     | s/n                | VIGITEL  |
| Excesso de peso                                   | s/n                | VIGITEL  |
| Obesidade                                         | s/n                | VIGITEL  |
| Consumo de hortaliças regularmente                | s/n                | VIGITEL  |
| Consumo de frutas regularmente                    | s/n                | VIGITEL  |
| Consumo de frutas legumes e verduras regularmente | s/n                | VIGITEL  |
| Consumo de carne regularmente                     | s/n                | VIGITEL  |
| Consumo de pele de frango                         | s/n                | VIGITEL  |
| Consumo de gordura da carne                       | s/n                | VIGITEL  |
| Consumo de leite integral                         | s/n                | VIGITEL  |
| Consumo de refrigerante                           | s/n                | VIGITEL  |
| Atividade física tempo livre                      | s/n                | VIGITEL  |
| Consumo abusivo de álcool                         | s/n                | VIGITEL  |
| Saúde autorrelatada (ruim)                        | s/n                | VIGITEL  |
| Hipertensão arterial sistêmica                    | s/n                | VIGITEL  |
| Diabetes                                          | s/n                | VIGITEL  |
| Tempo assistindo TV acima de 3 horas diárias      | s/n                | VIGITEL  |
| PIB bruto                                         | R\$                | IBGE     |
| PIB per capita                                    | R\$                | IBGE     |
| Valor da cesta básica                             | R\$                | PNCBA    |
| Índice de GINI para desigualdade                  | Coefficiente (0-1) | DATASUS  |
| Cobertura do abastecimento de água                | %                  | IBGE     |
| Investimentos em esporte e lazer                  | BR\$               | STN      |
| Investimentos em saúde                            | BR\$               | STN      |
| Cobertura de planos de saúde                      | n                  | DATASUS  |
| Cobertura de equipes de atenção básica            | n                  | DATASUS  |
| Cobertura de estratégia de saúde da família       | n                  | DATASUS  |
| Expectativa de vida                               | years              | IBGE     |
| Mortalidade por crime                             | n                  | IBGE     |
| Mortalidade por acidente                          | n                  | IBGE     |
| Número de habitantes                              | n                  | IBGE     |
| Número de ocupados em esporte e lazer             | n                  | IBGE/CCE |
| Famílias com renda inferior a meio salário mínimo | %                  | IBGE     |
| Famílias com renda entre 1/2 e 1 salário mínimo   | %                  | IBGE     |
| Famílias com renda entre 1 e 2 salários mínimos   | %                  | IBGE     |
| Famílias com renda superior a 2 salários mínimos  | %                  | IBGE     |

\*\*\*Marital status: s: single; m: married; d: divorced; w: widower; na: no answer.

**Table SM3 – Cut-off for social-ecological correlates into Tertiles**

|                                                                     | 1º TERCIL       | 2º TERCIL     | 3º TERCIL       |
|---------------------------------------------------------------------|-----------------|---------------|-----------------|
| <b>CONDIÇÃO</b>                                                     | <b>≥ ; &lt;</b> | <b>≥ ; ≤</b>  | <b>&gt; ; ≤</b> |
| Age                                                                 | 18 ; 33         | 33 ; 45       | 45 ; 59         |
| Crime Mortality (n/100,000 inhab.)                                  | 1.05 ; 25.9     | 25.9 ; 99.5   | 99.5 ; 1100     |
| Traffic Accident Mortality (n/100,000 inhab.)                       | 0.618 ; 15.8    | 15.8 ; 44.1   | 44.1 ; 482      |
| Population (milhões)                                                | 0.184 ; 0.585   | 0.585 ; 1.47  | 1.47 ; 12       |
| Female Proportion (%)                                               | 0.474 ; 0.52    | 0.52 ; 0.531  | 0.531 ; 0.54    |
| Vehicle Fleet (milions)                                             | 0.0554 ; 0.218  | 0.218 ; 0.548 | 0.548 ; 7.81    |
| Car Fleet (n/100,000 inhab.)                                        | 12500 ; 28700   | 28700 ; 44100 | 44100 ; 74100   |
| Bus Fleet (n/100,000 inhab.)                                        | 143 ; 360       | 360 ; 498     | 498 ; 792       |
| GINI (UA)                                                           | 0.419 ; 0.5     | 0.5 ; 0.541   | 0.541 ; 0.666   |
| Private Health Insurance (n/100,000 inhab.)                         | 5990 ; 24100    | 24100 ; 35300 | 35300 ; 77500   |
| GDP (milhões BR\$)                                                  | 2.04 ; 11.9     | 11.9 ; 31.6   | 31.6 ; 687      |
| GDP Per capita (BR\$/per capita)                                    | 7680 ; 17100    | 17100 ; 25000 | 25000 ; 79100   |
| Employees Physical Activity (inhab/n)                               | 195 ; 484       | 484 ; 1030    | 1030 ; 2910     |
| Company Physical Activity (inhab,/n)                                | 648 ; 1970      | 1970 ; 3510   | 3510 ; 7800     |
| Insolation (h/year)                                                 | 475 ; 2200      | 2200 ; 2430   | 2430 ; 3250     |
| Rainfall (mm/year)                                                  | 104 ; 1560      | 1560 ; 1910   | 1910 ; 3780     |
| Max Temperature (° C)                                               | 23 ; 29.7       | 29.7 ; 31.7   | 31.7 ; 35.5     |
| Min Temperatures (° C)                                              | 13.4 ; 21.3     | 21.3 ; 23.1   | 23.1 ; 25.7     |
| Relative Humidity (%)                                               | 56.2 ; 74.8     | 74.8 ; 78.9   | 78.9 ; 98       |
| Min Relative Humidity (%)                                           | 31 ; 66.1       | 66.1 ; 73.1   | 73.1 ; 98       |
| Max Relative Humidity (%)                                           | 62.6 ; 81.9     | 81.9 ; 85.3   | 85.3 ; 98       |
| Life expectancy (years)                                             | 67.3 ; 71.2     | 71.2 ; 73.8   | 73.8 ; 79.1     |
| Male Life expectancy (years)                                        | 63 ; 67.7       | 67.7 ; 70.4   | 70.4 ; 75.8     |
| Female Life expectancy (years)                                      | 71.2 ; 75.1     | 75.1 ; 77.5   | 77.5 ; 82.4     |
| FHS Public Health (n)                                               | 41 ; 98         | 98 ; 209      | 209 ; 1530      |
| Primary Care Coverage (%)                                           | 20.9 ; 53       | 53 ; 70.2     | 70.2 ; 100      |
| Public Investment* in Sports And Leisure Percapita (R\$/per capita) | 0.000562 ; 4.18 | 4.18 ; 10.5   | 10.5 ; 118      |
| Public Investment* in Health (R\$/per capita)                       | 118 ; 350       | 350 ; 550     | 550 ; 1260      |
| Drinking Water Distribution (%)                                     | 49.2 ; 89.8     | 89.8 ; 95.9   | 95.9 ; 99.3     |
| Basic Grocery Package (R\$)                                         | 132.0 ; 213.0   | 213.0 ; 272.0 | 272.0 ; 459.0   |
| Family Income < 1/2 min Wage/month (%)                              | 5.2 ; 16.7      | 16.7 ; 31.2   | 31.2 ; 47.1     |
| Family Income 1/2 to 1 min Wage/month (%)                           | 18 ; 29         | 29 ; 31.2     | 31.2 ; 36.4     |
| Family Income 1 to 2 min Wage/month (%)                             | 13.2 ; 20.4     | 20.4 ; 27.6   | 27.6 ; 38.6     |
| Family Income >2 min Wage/month (%)                                 | 7.9 ; 13.6      | 13.6 ; 21.2   | 21.2 ; 43.9     |

**Table SM4 – Encouraging social-ecological factors detection using complex samples logistical regression**

| LABELS                                               | MEN       |        |       |           |        |        |           |        |        | WOMEN     |        |           |        |           |        |       |       |       |
|------------------------------------------------------|-----------|--------|-------|-----------|--------|--------|-----------|--------|--------|-----------|--------|-----------|--------|-----------|--------|-------|-------|-------|
|                                                      | Age 18-32 |        |       | Age 33-45 |        |        | Age 46-60 |        |        | Age 18-32 |        | Age 33-45 |        | Age 46-60 |        |       |       |       |
|                                                      | OR        | 95% CI |       | OR        | 95% CI |        | OR        | 95% CI |        | OR        | 95% CI | OR        | 95% CI | OR        | 95% CI |       |       |       |
| TABACO USE (n vs, y)                                 | 0.925     | 0.786  | 1.089 | 0.663     | 0.54   | 0.814  | 0.681     | 0.567  | 0.818  | 0.984     | 0.757  | 1.279     | 0.807  | 0.633     | 1.028  | 0.747 | 0.627 | 0.89  |
| OBESITY (n vs, y)                                    | 1.297     | 1.125  | 1.496 | 1.088     | 0.946  | 1.252  | 1.243     | 1.081  | 1.429  | 1.021     | 0.859  | 1.213     | 1.238  | 1.078     | 1.422  | 1.257 | 1.114 | 1.417 |
| VEGETABLES (y vs, n)                                 | 1.286     | 1.109  | 1.491 | 1.531     | 1.275  | 1.838  | 1.54      | 1.263  | 1.878  | 1.615     | 1.351  | 1.93      | 1.708  | 1.395     | 2.092  | 1.457 | 1.164 | 1.823 |
| FRUITS (y vs, n)                                     | 1.667     | 1.473  | 1.886 | 1.457     | 1.23   | 1.725  | 1.732     | 1.456  | 2.061  | 1.61      | 1.38   | 1.879     | 1.917  | 1.606     | 2.287  | 1.754 | 1.452 | 2.118 |
| FLV (y vs, n)                                        | 1.066     | 0.885  | 1.285 | 1.054     | 0.837  | 1.328  | 0.942     | 0.742  | 1.195  | 0.974     | 0.788  | 1.204     | 0.804  | 0.638     | 1.014  | 1.033 | 0.806 | 1.324 |
| MEAT (n vs, y)                                       | 1.011     | 0.849  | 1.205 | 1.005     | 0.789  | 1.278  | 1.056     | 0.815  | 1.369  | 1.002     | 0.753  | 1.332     | 1.259  | 0.91      | 1.743  | 1.538 | 1.072 | 2.206 |
| CHICKEN SKIN (n vs, y)                               | 0.845     | 0.72   | 0.991 | 0.984     | 0.797  | 1.215  | 1.192     | 0.936  | 1.518  | 1.27      | 0.986  | 1.635     | 1.167  | 0.869     | 1.568  | 1.601 | 1.148 | 2.233 |
| MEAT FAT (n vs, y)                                   | 1.196     | 0.968  | 1.477 | 1.249     | 0.939  | 1.661  | 1.061     | 0.782  | 1.439  | 0.976     | 0.711  | 1.34      | 0.989  | 0.689     | 1.419  | 0.654 | 0.441 | 0.971 |
| MILK (y vs, n)                                       | 0.881     | 0.803  | 0.966 | 0.823     | 0.736  | 0.92   | 0.766     | 0.687  | 0.854  | 0.747     | 0.678  | 0.823     | 0.769  | 0.697     | 0.848  | 0.766 | 0.699 | 0.839 |
| SODA (n vs, y)                                       | 1.253     | 1.122  | 1.4   | 1.413     | 1.209  | 1.65   | 1.234     | 1.036  | 1.469  | 1.219     | 1.065  | 1.394     | 1.466  | 1.241     | 1.73   | 1.388 | 1.152 | 1.671 |
| ALCOOL ABUSE (n vs, y)                               | 1.018     | 0.921  | 1.126 | 0.971     | 0.859  | 1.098  | 0.937     | 0.827  | 1.062  | 0.842     | 0.736  | 0.962     | 0.803  | 0.693     | 0.93   | 0.833 | 0.718 | 0.966 |
| POOR HEALTH SELF-RELATED (n vs, y)                   | 2.011     | 1.382  | 2.927 | 2.441     | 1.533  | 3.886  | 2.529     | 1.695  | 3.773  | 1.566     | 1.122  | 2.186     | 1.839  | 1.342     | 2.52   | 1.888 | 1.462 | 2.438 |
| HYPERTENSION (n vs, y)                               | 1.167     | 0.958  | 1.423 | 1.113     | 0.955  | 1.297  | 1.014     | 0.902  | 1.14   | 1.819     | 1.408  | 2.35      | 1.183  | 1.027     | 1.362  | 1.15  | 1.044 | 1.267 |
| DIABETES (n vs, y)                                   | 1.307     | 0.795  | 2.148 | 1.519     | 1.091  | 2.114  | 1.121     | 0.932  | 1.348  | 0.974     | 0.638  | 1.487     | 1.267  | 0.948     | 1.692  | 1.00  | 0.856 | 1.168 |
| CRIME MORTALITY (1 vs, 3)                            | 0.702     | 0.482  | 1.023 | 0.888     | 0.558  | 1.412  | 0.807     | 0.508  | 1.283  | 0.889     | 0.591  | 1.336     | 0.953  | 0.641     | 1.416  | 1.195 | 0.824 | 1.733 |
| CRIME MORTALITY (2 vs, 3)                            | 0.872     | 0.658  | 1.157 | 0.898     | 0.636  | 1.266  | 0.968     | 0.685  | 1.368  | 1.206     | 0.893  | 1.63      | 0.984  | 0.727     | 1.331  | 1.287 | 0.961 | 1.724 |
| TRAFFIC ACCIDENT MORTALITY (1 vs, 3)                 | 1.432     | 0.939  | 2.182 | 1.037     | 0.623  | 1.727  | 0.939     | 0.56   | 1.573  | 1.611     | 1.027  | 2.526     | 1.177  | 0.763     | 1.816  | 0.902 | 0.598 | 1.359 |
| TRAFFIC ACCIDENT MORTALITY (2 vs, 3)                 | 1.129     | 0.826  | 1.544 | 1.139     | 0.78   | 1.664  | 0.916     | 0.623  | 1.346  | 0.957     | 0.685  | 1.338     | 0.958  | 0.687     | 1.337  | 0.942 | 0.684 | 1.298 |
| POPULATION (2 vs, 1)                                 | 1.346     | 0.582  | 3.112 | 0.63      | 0.212  | 1.869  | 1.388     | 0.427  | 4.51   | 0.327     | 0.12   | 0.895     | 0.917  | 0.339     | 2.479  | 0.372 | 0.134 | 1.031 |
| POPULATION (3 vs, 1)                                 | 1.955     | 0.826  | 4.629 | 0.706     | 0.238  | 2.096  | 1.376     | 0.442  | 4.289  | 0.332     | 0.12   | 0.918     | 1.126  | 0.412     | 3.08   | 0.724 | 0.27  | 1.946 |
| FEMALE PROPORTION (2 vs, 1)                          | 0.776     | 0.419  | 1.437 | 1.736     | 0.787  | 3.828  | 1.034     | 0.445  | 2.404  | 1.875     | 0.921  | 3.815     | 0.955  | 0.473     | 1.928  | 1.679 | 0.829 | 3.401 |
| FEMALE PROPORTION (2 vs, 1)                          | 0.857     | 0.434  | 1.694 | 1.484     | 0.63   | 3.496  | 1.131     | 0.461  | 2.775  | 2.145     | 0.997  | 4.614     | 1.304  | 0.621     | 2.738  | 1.467 | 0.717 | 3.001 |
| VEHICLE FLEET [1/100,000] (2 vs, 1)                  | 1.009     | 0.332  | 3.069 | 2.576     | 0.662  | 10.032 | 0.427     | 0.105  | 1.737  | 1.401     | 0.384  | 5.117     | 0.795  | 0.238     | 2.651  | 1.948 | 0.565 | 6.719 |
| VEHICLE FLEET [1/100,000] (3 vs, 1)                  | 0.409     | 0.121  | 1.386 | 1.939     | 0.446  | 8.426  | 0.195     | 0.042  | 0.914  | 1.045     | 0.259  | 4.215     | 0.78   | 0.209     | 2.907  | 1.577 | 0.423 | 5.88  |
| CAR FLEET [1/100,000] (2 vs, 1)                      | 1.121     | 0.399  | 3.147 | 0.492     | 0.144  | 1.683  | 2.987     | 0.832  | 10.723 | 1.121     | 0.349  | 3.596     | 1.832  | 0.621     | 5.406  | 0.592 | 0.194 | 1.812 |
| CAR FLEET [1/100,000] (3 vs, 1)                      | 1.314     | 0.456  | 3.789 | 0.535     | 0.154  | 1.859  | 3.594     | 0.981  | 13.161 | 1.045     | 0.324  | 3.374     | 1.114  | 0.37      | 3.361  | 0.597 | 0.199 | 1.791 |
| BUS FLEET [1/100,000] (2 vs, 1)                      | 1.306     | 0.798  | 2.138 | 0.896     | 0.474  | 1.697  | 1.503     | 0.771  | 2.929  | 1.328     | 0.746  | 2.363     | 1.018  | 0.568     | 1.824  | 0.918 | 0.529 | 1.592 |
| BUS FLEET [1/100,000] (3 vs, 1)                      | 1.441     | 0.753  | 2.757 | 1.053     | 0.467  | 2.376  | 1.078     | 0.446  | 2.603  | 0.834     | 0.399  | 1.742     | 0.867  | 0.409     | 1.837  | 0.761 | 0.365 | 1.586 |
| GINI (2 vs, 1)                                       | 1.158     | 0.817  | 1.642 | 0.949     | 0.622  | 1.447  | 1.073     | 0.689  | 1.673  | 0.967     | 0.667  | 1.402     | 1.306  | 0.899     | 1.898  | 1.092 | 0.764 | 1.562 |
| GINI (3 vs, 1)                                       | 1.12      | 0.79   | 1.59  | 0.864     | 0.553  | 1.35   | 0.702     | 0.439  | 1.12   | 0.627     | 0.421  | 0.933     | 0.694  | 0.474     | 1.017  | 0.681 | 0.462 | 1.005 |
| PRIVATE HEALTH INSURANCE [1/100,000] (2 vs, 1)       | 0.557     | 0.273  | 1.135 | 0.914     | 0.379  | 2.205  | 1.146     | 0.435  | 3.021  | 1.221     | 0.541  | 2.756     | 1.285  | 0.571     | 2.891  | 3.701 | 1.577 | 8.687 |
| PRIVATE HEALTH INSURANCE [1/100,000] (3 vs, 1)       | 0.455     | 0.243  | 0.853 | 0.619     | 0.286  | 1.343  | 0.63      | 0.272  | 1.461  | 0.962     | 0.474  | 1.955     | 0.686  | 0.343     | 1.372  | 1.903 | 0.928 | 3.903 |
| GDP PERCAPITA [BR\$] (2 vs, 1)                       | 1.632     | 0.757  | 3.52  | 0.869     | 0.345  | 2.192  | 1.015     | 0.367  | 2.808  | 1.109     | 0.487  | 2.523     | 1.151  | 0.507     | 2.61   | 0.64  | 0.279 | 1.468 |
| GDP PERCAPITA [BR\$] (3 vs, 1)                       | 1.541     | 0.541  | 4.391 | 0.831     | 0.236  | 2.928  | 1.303     | 0.34   | 4.997  | 0.977     | 0.319  | 2.994     | 1.371  | 0.451     | 4.169  | 0.374 | 0.126 | 1.112 |
| EMPLOYEES PHYSICAL ACTIVITY [inhabit rate] (2 vs, 1) | 0.802     | 0.49   | 1.311 | 1.164     | 0.606  | 2.236  | 0.672     | 0.351  | 1.285  | 1.488     | 0.863  | 2.567     | 0.805  | 0.461     | 1.405  | 0.973 | 0.578 | 1.637 |
| EMPLOYEES PHYSICAL ACTIVITY [inhabit rate] (3 vs, 1) | 0.921     | 0.512  | 1.657 | 1.691     | 0.787  | 3.635  | 1.437     | 0.642  | 3.217  | 1.672     | 0.855  | 3.27      | 1.371  | 0.702     | 2.676  | 2.011 | 1.031 | 3.921 |
| COMPANY PHYSICAL ACTIVITY [inhabit rate] (2 vs, 1)   | 1.418     | 0.795  | 2.53  | 1.262     | 0.641  | 2.483  | 1.385     | 0.688  | 2.789  | 0.807     | 0.438  | 1.488     | 1.607  | 0.902     | 2.863  | 0.879 | 0.49  | 1.577 |
| COMPANY PHYSICAL ACTIVITY [inhabit rate] (3 vs, 1)   | 1.787     | 0.773  | 4.131 | 2.166     | 0.817  | 5.743  | 1.92      | 0.68   | 5.425  | 1.331     | 0.545  | 3.253     | 1.586  | 0.661     | 3.803  | 0.619 | 0.259 | 1.478 |

|                                                                     |       |       |       |       |       |       |       |       |       |       |       |       |       |       |       |       |       |       |
|---------------------------------------------------------------------|-------|-------|-------|-------|-------|-------|-------|-------|-------|-------|-------|-------|-------|-------|-------|-------|-------|-------|
| INSOLATION [hours] (2 vs, 1)                                        | 0.849 | 0.599 | 1.204 | 1.197 | 0.773 | 1.854 | 1.275 | 0.837 | 1.941 | 0.846 | 0.567 | 1.261 | 1.077 | 0.746 | 1.554 | 1.122 | 0.781 | 1.611 |
| INSOLATION [hours] (3 vs, 1)                                        | 0.818 | 0.609 | 1.098 | 1.079 | 0.756 | 1.54  | 1.035 | 0.733 | 1.461 | 0.793 | 0.57  | 1.104 | 1.006 | 0.74  | 1.368 | 1.016 | 0.756 | 1.365 |
| RAINFALL [mm3] (1 vs, 3)                                            | 1.021 | 0.751 | 1.387 | 1.032 | 0.717 | 1.487 | 1.331 | 0.922 | 1.923 | 0.925 | 0.661 | 1.294 | 1.071 | 0.772 | 1.485 | 1.141 | 0.849 | 1.534 |
| RAINFALL [mm3] (1 vs, 2)                                            | 0.944 | 0.76  | 1.173 | 1.199 | 0.921 | 1.561 | 1.028 | 0.789 | 1.34  | 1.279 | 1.006 | 1.626 | 0.772 | 0.61  | 0.978 | 1.113 | 0.892 | 1.388 |
| MAX TEMPERATURE [Celsius] (2 vs, 1)                                 | 1.327 | 0.82  | 2.148 | 1.488 | 0.822 | 2.693 | 1.284 | 0.717 | 2.299 | 1.266 | 0.739 | 2.168 | 1.108 | 0.649 | 1.892 | 1.033 | 0.646 | 1.652 |
| MAX TEMPERATURE [Celsius] (2 vs, 1)                                 | 1.104 | 0.785 | 1.552 | 1.203 | 0.795 | 1.818 | 0.872 | 0.568 | 1.337 | 1.361 | 0.943 | 1.965 | 0.992 | 0.696 | 1.414 | 0.809 | 0.576 | 1.136 |
| MIN TEMPERATURE [Celsius] (2 vs, 1)                                 | 1.101 | 0.726 | 1.67  | 1.533 | 0.924 | 2.543 | 1.72  | 1.038 | 2.851 | 0.907 | 0.57  | 1.444 | 1.088 | 0.695 | 1.703 | 1.992 | 1.313 | 3.022 |
| MIN TEMPERATURE [Celsius] (2 vs, 1)                                 | 0.634 | 0.344 | 1.167 | 1.104 | 0.515 | 2.367 | 0.758 | 0.352 | 1.632 | 0.717 | 0.369 | 1.394 | 0.767 | 0.396 | 1.483 | 1.384 | 0.744 | 2.577 |
| AVERAGE HUMIDITY [%] (1 vs, 2)                                      | 0.923 | 0.462 | 1.843 | 1.169 | 0.505 | 2.705 | 0.86  | 0.354 | 2.089 | 1.932 | 0.91  | 4.1   | 0.756 | 0.364 | 1.569 | 1.275 | 0.622 | 2.613 |
| AVERAGE HUMIDITY [%] (1 vs, 3)                                      | 1.212 | 0.65  | 2.258 | 1.046 | 0.494 | 2.214 | 1.05  | 0.473 | 2.329 | 1.816 | 0.92  | 3.587 | 0.854 | 0.442 | 1.648 | 1.103 | 0.581 | 2.096 |
| MIN HUMIDITY [%] (2 vs, 1)                                          | 0.95  | 0.695 | 1.298 | 0.978 | 0.664 | 1.439 | 0.597 | 0.413 | 0.862 | 0.925 | 0.653 | 1.311 | 0.828 | 0.59  | 1.164 | 0.688 | 0.503 | 0.942 |
| MIN HUMIDITY [%] (3 vs, 1)                                          | 1.273 | 0.677 | 2.392 | 1.1   | 0.519 | 2.332 | 0.908 | 0.42  | 1.963 | 1.774 | 0.889 | 3.537 | 0.909 | 0.476 | 1.739 | 0.943 | 0.506 | 1.758 |
| MAX HUMIDITY [%] (2 vs, 1)                                          | 1.27  | 0.815 | 1.979 | 1.275 | 0.72  | 2.26  | 1.832 | 1.033 | 3.248 | 0.857 | 0.518 | 1.418 | 1.167 | 0.706 | 1.93  | 1.098 | 0.678 | 1.778 |
| MAX HUMIDITY [%] (3 vs, 1)                                          | 1.233 | 0.836 | 1.817 | 1.193 | 0.728 | 1.954 | 1.731 | 1.066 | 2.813 | 0.896 | 0.581 | 1.382 | 1.095 | 0.711 | 1.688 | 1.212 | 0.812 | 1.808 |
| LIFE EXPECTANCY [years] (2 vs, 1)                                   | 0.789 | 0.508 | 1.226 | 1.053 | 0.603 | 1.837 | 1.097 | 0.649 | 1.857 | 0.908 | 0.563 | 1.464 | 0.845 | 0.518 | 1.379 | 0.752 | 0.478 | 1.181 |
| LIFE EXPECTANCY [years] (3 vs, 1)                                   | 0.741 | 0.343 | 1.602 | 0.837 | 0.317 | 2.21  | 0.737 | 0.278 | 1.958 | 1.058 | 0.449 | 2.493 | 0.505 | 0.214 | 1.189 | 0.91  | 0.418 | 1.982 |
| MALE LIFE EXPECTANCY [years] (2 vs, 1)                              | 1.162 | 0.695 | 1.941 | 0.98  | 0.509 | 1.887 | 0.903 | 0.472 | 1.728 | 0.869 | 0.487 | 1.549 | 1.398 | 0.781 | 2.505 | 1.728 | 1.013 | 2.947 |
| MALE LIFE EXPECTANCY [years] (3 vs, 1)                              | 1.585 | 0.769 | 3.265 | 1.131 | 0.458 | 2.791 | 0.96  | 0.376 | 2.454 | 1.071 | 0.473 | 2.421 | 2.622 | 1.173 | 5.862 | 1.742 | 0.818 | 3.712 |
| FEMALE LIFE EXPECTANCY [years] (2 vs, 1)                            | 1.324 | 0.737 | 2.377 | 1.739 | 0.849 | 3.561 | 1.403 | 0.678 | 2.904 | 1.76  | 0.925 | 3.349 | 1.287 | 0.678 | 2.441 | 1.295 | 0.701 | 2.392 |
| FEMALE LIFE EXPECTANCY [years] (3 vs, 1)                            | 1.259 | 0.639 | 2.481 | 2.057 | 0.888 | 4.765 | 1.435 | 0.626 | 3.289 | 1.501 | 0.704 | 3.199 | 1.585 | 0.766 | 3.281 | 1.165 | 0.589 | 2.304 |
| FHS PUBLIC HEALTH [n] (2 vs, 1)                                     | 1.00  | 0.635 | 1.573 | 1.061 | 0.598 | 1.882 | 0.892 | 0.509 | 1.562 | 0.816 | 0.503 | 1.322 | 0.851 | 0.52  | 1.393 | 0.905 | 0.58  | 1.412 |
| FHS PUBLIC HEALTH [n] (3 vs, 1)                                     | 0.489 | 0.225 | 1.064 | 0.798 | 0.309 | 2.063 | 0.379 | 0.145 | 0.991 | 0.868 | 0.37  | 2.034 | 0.406 | 0.175 | 0.939 | 0.53  | 0.238 | 1.182 |
| PRIMARY CARE COVERAGE [%] (2 vs, 1)                                 | 1.033 | 0.733 | 1.456 | 1.159 | 0.759 | 1.768 | 0.879 | 0.578 | 1.336 | 1.042 | 0.708 | 1.533 | 1.161 | 0.797 | 1.691 | 1.06  | 0.744 | 1.512 |
| PRIMARY CARE COVERAGE [%] (2 vs, 1)                                 | 1.143 | 0.782 | 1.671 | 0.973 | 0.612 | 1.547 | 0.765 | 0.488 | 1.2   | 0.919 | 0.599 | 1.411 | 0.877 | 0.584 | 1.317 | 1.383 | 0.947 | 2.019 |
| PUBLIC INVESTMENT* IN SPORTS AND LEISURE PERCAPITA [BR\$] (2 vs, 1) | 1.115 | 0.896 | 1.387 | 0.966 | 0.744 | 1.255 | 1.107 | 0.847 | 1.448 | 1.17  | 0.932 | 1.469 | 0.95  | 0.757 | 1.192 | 1.146 | 0.92  | 1.429 |
| PUBLIC INVESTMENT* IN SPORTS AND LEISURE PERCAPITA [BR\$] (3 vs, 1) | 1.216 | 0.871 | 1.697 | 1.403 | 0.922 | 2.134 | 1.863 | 1.226 | 2.833 | 1.298 | 0.887 | 1.9   | 1.107 | 0.772 | 1.587 | 1.545 | 1.093 | 2.183 |
| PUBLIC INVESTMENT* IN HEALTH PERCAPITA [BR\$] (2 vs, 1)             | 1.052 | 0.609 | 1.816 | 0.586 | 0.299 | 1.145 | 0.293 | 0.145 | 0.594 | 0.665 | 0.364 | 1.216 | 0.669 | 0.373 | 1.199 | 0.899 | 0.503 | 1.608 |
| PUBLIC INVESTMENT* IN HEALTH PERCAPITA [BR\$] (3 vs, 1)             | 1.594 | 0.885 | 2.871 | 0.758 | 0.371 | 1.545 | 0.58  | 0.281 | 1.2   | 0.784 | 0.411 | 1.494 | 0.765 | 0.405 | 1.445 | 1.259 | 0.685 | 2.312 |
| DRINKING WATER DISTRIBUTION [%] (2 vs, 1)                           | 1.159 | 0.683 | 1.968 | 1.027 | 0.547 | 1.926 | 1.643 | 0.831 | 3.25  | 0.859 | 0.47  | 1.57  | 1.313 | 0.726 | 2.377 | 0.798 | 0.456 | 1.396 |
| DRINKING WATER DISTRIBUTION [%] (3 vs, 1)                           | 1.417 | 0.683 | 2.94  | 0.898 | 0.379 | 2.129 | 2.302 | 0.911 | 5.815 | 1.106 | 0.49  | 2.497 | 1.901 | 0.848 | 4.261 | 0.641 | 0.294 | 1.396 |
| BASIC GROCERY PACKAGE [BR\$] (1 vs, 3)                              | 1.094 | 0.524 | 2.285 | 0.665 | 0.259 | 1.708 | 0.775 | 0.285 | 2.105 | 0.611 | 0.267 | 1.398 | 0.947 | 0.419 | 2.143 | 1.425 | 0.63  | 3.223 |
| BASIC GROCERY PACKAGE [BR\$] (2 vs, 3)                              | 0.897 | 0.693 | 1.161 | 0.895 | 0.64  | 1.251 | 0.815 | 0.591 | 1.124 | 0.855 | 0.643 | 1.136 | 0.883 | 0.668 | 1.169 | 0.963 | 0.735 | 1.262 |
| FAMILY INCOME < 1/2 MIN WAGE [%] (1 vs, 3)                          | 1.138 | 0.586 | 2.209 | 0.521 | 0.227 | 1.199 | 0.513 | 0.22  | 1.196 | 0.972 | 0.45  | 2.097 | 0.96  | 0.466 | 1.977 | 0.656 | 0.323 | 1.333 |
| FAMILY INCOME < 1/2 MIN WAGE [%] (2 vs, 3)                          | 1.299 | 0.866 | 1.948 | 0.692 | 0.412 | 1.161 | 1.143 | 0.679 | 1.926 | 0.875 | 0.554 | 1.383 | 1.047 | 0.68  | 1.614 | 0.963 | 0.623 | 1.487 |
| FAMILY INCOME 1/2 TO 1 MIN WAGE [%] (1 vs, 3)                       | 0.72  | 0.482 | 1.077 | 1.634 | 0.977 | 2.732 | 1.392 | 0.84  | 2.306 | 1.106 | 0.704 | 1.738 | 1.426 | 0.918 | 2.217 | 0.917 | 0.603 | 1.395 |
| FAMILY INCOME 1/2 TO 1 MIN WAGE [%] (3 vs, 3)                       | 0.784 | 0.54  | 1.136 | 1.564 | 0.968 | 2.526 | 0.988 | 0.613 | 1.593 | 1.281 | 0.846 | 1.942 | 1.484 | 0.989 | 2.226 | 1.16  | 0.781 | 1.722 |
| FAMILY INCOME 1 TO 2 MIN WAGE [%] (2 vs, 1)                         | 1.948 | 0.909 | 4.176 | 0.942 | 0.358 | 2.481 | 1.287 | 0.448 | 3.702 | 0.962 | 0.386 | 2.395 | 0.765 | 0.307 | 1.909 | 0.847 | 0.337 | 2.127 |
| FAMILY INCOME 1 TO 2 MIN WAGE [%] (3 vs, 1)                         | 1.48  | 0.703 | 3.116 | 0.802 | 0.315 | 2.043 | 0.775 | 0.283 | 2.12  | 0.803 | 0.335 | 1.925 | 0.912 | 0.382 | 2.176 | 0.682 | 0.285 | 1.631 |
| FAMILY INCOME > 2 MIN WAGE [%] (2 vs, 1)                            | 1.447 | 0.862 | 2.431 | 1.354 | 0.736 | 2.489 | 0.749 | 0.397 | 1.413 | 1.545 | 0.867 | 2.753 | 0.663 | 0.377 | 1.163 | 1.138 | 0.675 | 1.917 |
| FAMILY INCOME > 2 MIN WAGE [%] (3 vs, 1)                            | 1.586 | 0.627 | 4.013 | 0.879 | 0.283 | 2.727 | 1.006 | 0.31  | 3.263 | 0.662 | 0.233 | 1.877 | 0.44  | 0.161 | 1.202 | 0.947 | 0.35  | 2.566 |
| TV > 3 HOURS/DAY (n vs, y)                                          | 1.09  | 0.976 | 1.217 | 1.036 | 0.905 | 1.186 | 1.022 | 0.897 | 1.164 | 1.001 | 0.889 | 1.127 | 1.109 | 0.974 | 1.261 | 1.041 | 0.936 | 1.159 |
